# Supplementary material
Source: Springer Nature journal article supplement (https://www.springermedizin.de/resource/supplementary/12995_2008_93_MOESM3_ESM.pdf/9622736)

Mean  $\pm$  S.E. (n = 6)

Decay constant

( $\times 10^{-3}/s$ )

□ Control  
■ RW

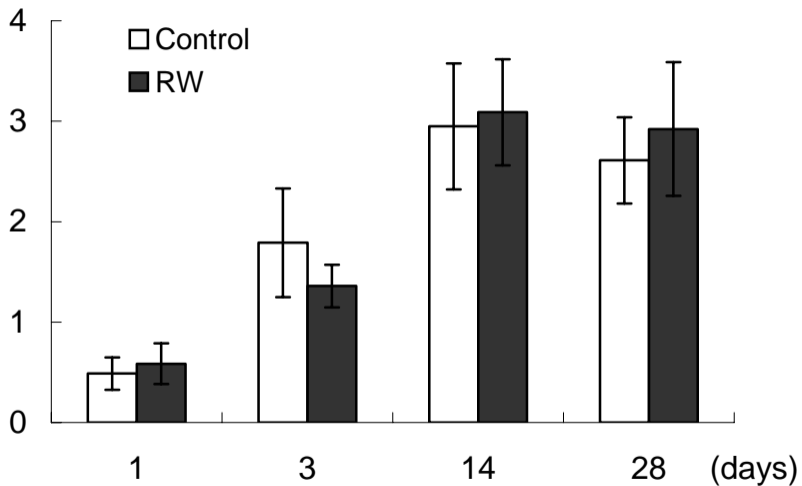

Days after RW exposure

Supplement: MOESM3 [file 9622736]
